# Supplementary material for: Turn up the Dial: System Dynamics Modeling of Resource Allocations toward Rural Water Supply Maintenance in East Africa
Source: Atypon-hosted journal article supplement (doi:10.1061/(asce)ee.1943-7870.0001982), 2022-02-01
Supplement: supplemental_materials_ee.1943-7870.0001982_chintalapati.pdf [file supplemental_materials_ee.1943-7870.0001982_chintalapati.pdf]

## SUPPLEMENTAL MATERIALS

*ASCE Journal of Environmental Engineering*

# Turn up the Dial: System Dynamics Modeling of Resource Allocations toward Rural Water Supply Maintenance in East Africa

Pranav Chintalapati, Anna Libey, Styvers Kathuni, Bernard  
Amadei, and Evan Thomas

**DOI:** 10.1061/(ASCE)EE.1943-7870.0001982

© ASCE 2022

[www.ascelibrary.org](http://www.ascelibrary.org)

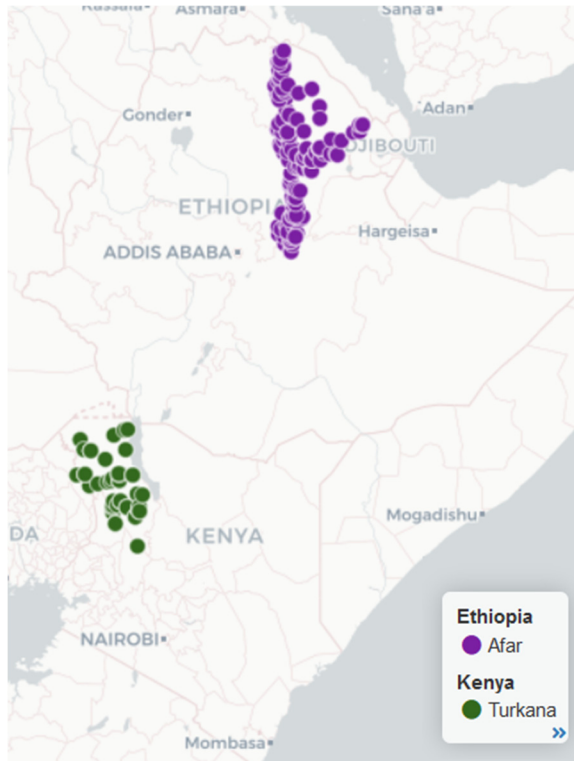

|                                      | <b>Afar Region,<br/>Ethiopia</b> | <b>Turkana<br/>County,<br/>Kenya</b> |
|--------------------------------------|----------------------------------|--------------------------------------|
| Population                           | 1,812,000<br>(2017)              | 926,976 (2019)                       |
| Area                                 | 72,053 km <sup>2</sup>           | 68,233 km <sup>2</sup>               |
| Mean Annual<br>Rainfall              | 188 mm                           | 186 mm                               |
| # of Motorized<br>Boreholes          | 300                              | 400                                  |
| Rural Basic<br>Water Access<br>(JMP) | 34.8%<br>(Ethiopia,<br>2020)     | 51.8% (Kenya,<br>2020)               |
| Rural Safe<br>Water Access<br>(JMP)  | 5.2%<br>(Ethiopia,<br>2020)      | 0% (Kenya,<br>2020)                  |

**Fig. S1.** Borehole locations with sensors and characteristics of the case study regions of Turkana County, Kenya, and Afar Region, Ethiopia. [Data from Central Statistical Agency 2013; Kenya National Bureau of Statistics 2019; Climate-Data.org 2019; WHO and UNICEF 2020; map generated using mWater (mwater.co).]

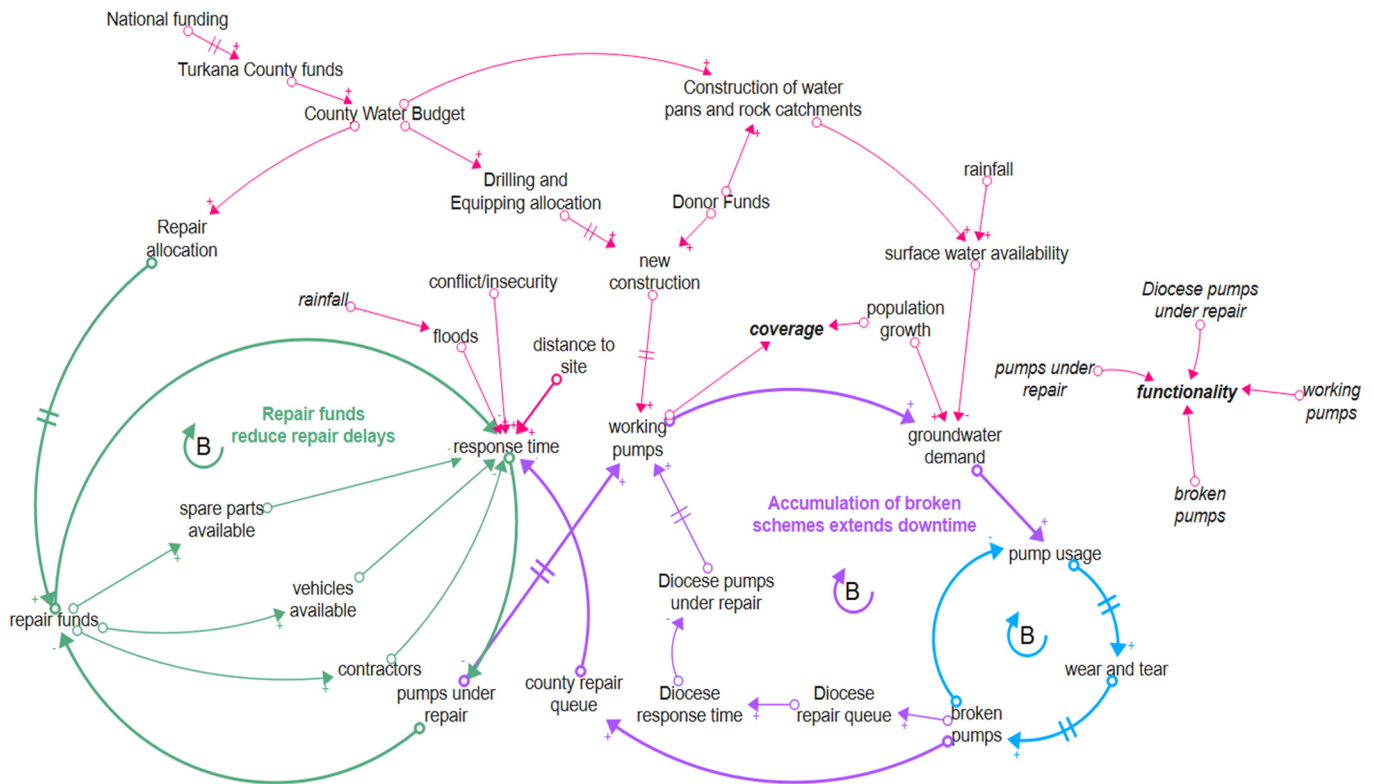

**Fig. S2.** The causal loop diagram of the Turkana rural water system shows balancing feedback loops of pump usage leading to wear and tear and eventual breakdowns, reducing overall use (blue). The accumulation of broken pumps leads to extended response times and delayed repairs (purple). Repair and maintenance funds increase the availability of resources and reduce repair delays, increasing the number of working pumps (green). Output variables, in bold, are functionality and coverage.

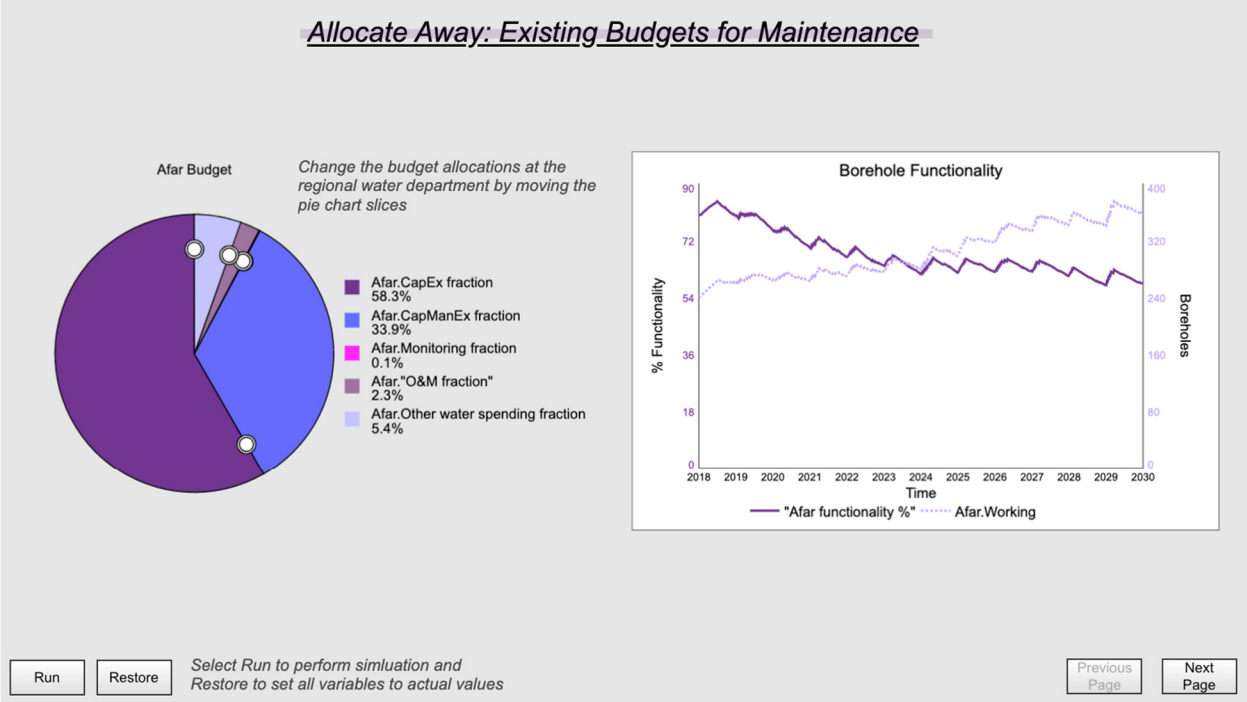

**Fig. S3.** Screenshot of page 1 out of 4 of the model interface for adjusting resources to support water service delivery and motorized borehole government-led maintenance. The published model interface can be found on the ISEE Systems Exchange at: <https://exchange.iseesystems.com/public/alibey/kenya-ethiopia-maintenance/index.html#page1>], where readers may adjust budget allocations themselves and see the resulting impacts on simulated borehole functionality in the regions. The borehole maintenance interface is a dissemination tool for optimization and comparison of the current funding levels for maintenance in the regions with potential scenarios for “turning up the dial” on resources for improved functionality, and to see what additional increases in funding are needed to reverse current downward trends.

**Table S1. Model Variables**

S = stock, F = flow, C = converter, \* = arrayed variable

| Variables                                      | Type | Value or Equation                                               | Units           | Source if input |
|------------------------------------------------|------|-----------------------------------------------------------------|-----------------|-----------------|
| Afar."breaking (non rounded)"                  | F    | breakdown_rate                                                  | Boreholes/Weeks |                 |
| Afar."Building/admin maintenance"              | F    | PULSE(0.9*CapManEx_Funds, 3, 52)                                | ETB/Weeks       |                 |
| Afar."Donor funds (USD)"                       | C    | Graphical input ranging from 0 to 10000000 USD                  | USD             |                 |
| Afar."Donor/National Agency installation rate" | C    | "Donor_funds_(USD)"*earmarked_for_new_construction/BH_unit_cost | units/year      |                 |

|                                      |    |                                                                                                                                                              |                 |                      |
|--------------------------------------|----|--------------------------------------------------------------------------------------------------------------------------------------------------------------|-----------------|----------------------|
| Afar."installing/fixing sensors"     | F  | IF(Monitoring_Funds>(cost_per_sensor*(1+inflation)^(TIME/52)) AND Sensors<total_boreholes) THEN(target_sensor_install_rate) ELSE 0                           | sensors/Weeks   |                      |
| Afar."Maintenance tools, phones"     | C  | 100000                                                                                                                                                       | ETB             | AWIEB Budget         |
| Afar."removing/ breaking sensors"    | F  | ROUND(Sensors/sensor_lifetime)                                                                                                                               | sensors/Weeks   |                      |
| Afar.access                          | C  | Working*1600/rural_population                                                                                                                                | persons         |                      |
| Afar.Admin allocation                | C  | PULSE(Other_water_spending_fraction*(donor_funding+Water_Bureau_Allocation), 1, 52)                                                                          | ETB/Weeks       |                      |
| Afar.Airtime costs                   | C  | 21600                                                                                                                                                        | ETB             | AWIEB Budget         |
| Afar.all broken                      | C  | SUM(Broken[*])                                                                                                                                               | Boreholes       |                      |
| Afar.Asset inventory updating mWater | C  | 100000                                                                                                                                                       | ETB             | AWIEB Budget         |
| Afar.Available Heavy Equipment       | S  | heavy_vehicle_purchasing + heavy_vehicles_returning - heavy_vehicles_deploying - expiring                                                                    | vehicles        |                      |
| Afar.Available light vehicles        | S  | light_vehicle_purchasing + light_vehicles_returning - light_vehicles_deploying - expiring_1                                                                  | vehicles        |                      |
| Afar.available spare parts           | C  | minor_parts_in_stock+major_parts_in_stock                                                                                                                    | parts           |                      |
| Afar.avg driving distance per day    | C* | 80 km/hr * 6 hours of driving if Breakdown_type = Minor, 50 kn/hr * 6 hours of driving if Breakdown_type = Major                                             | Kilometers/days |                      |
| Afar.avg production                  | C  | MAX(0, NORMAL(7.323458, 5))                                                                                                                                  | L/s             | Afar asset inventory |
| Afar.BH unit cost                    | C  | 3730000                                                                                                                                                      | ETB             | AWIEB Budget         |
| Afar.breakdown rate                  | C  | SAFEDIV(breakdowns, TIME)                                                                                                                                    | Boreholes/Weeks |                      |
| Afar.breakdown threshold             | C  | Set using model calibration                                                                                                                                  | Hours           |                      |
| Afar.breakdowns                      | C  | Hours_pumped/breakdown_threshold                                                                                                                             | Boreholes       |                      |
| Afar.breakdowns verified             | C  | MAX(10, Sensors)                                                                                                                                             | Boreholes/Days  |                      |
| Afar.breaking                        | F* | ROUND(breakdown_rate*(1-major_breakdown_probability)) if Breakdown_type = Major, ROUND(breakdown_rate*minor_breakdown_probability) if Breakdown_type = Minor | Boreholes/Weeks |                      |
| Afar.Broken                          | S* | breaking - repairing                                                                                                                                         | Boreholes       |                      |
| Afar.Capacity building to wordas     | C  | 70000                                                                                                                                                        | ETB             | AWIEB Budget         |
| Afar.CapEx allocation                | F  | PULSE(CapEx_fraction*(Water_Bureau_Allocation+donor_funding), 1, 52)                                                                                         | ETB/Weeks       |                      |

|                                     |    |                                                                                                                                                                                                    |                 |                                        |
|-------------------------------------|----|----------------------------------------------------------------------------------------------------------------------------------------------------------------------------------------------------|-----------------|----------------------------------------|
| Afar.CapEx fraction                 | C  | 0.195                                                                                                                                                                                              | ETB             | AWIEB Budget                           |
| Afar.capital equipment spending     | F  | $(\text{Cost\_per\_heavy\_vehicle} * \text{vehicle\_purchasing} + \text{light\_vehicle\_purchasing} * \text{cost\_per\_light\_vehicle}) * (1 + \text{inflation})^{(\text{TIME}/52)}$               | ETB/Weeks       |                                        |
| Afar.CapManEx allocation            | F  | $\text{PULSE}(\text{CapManEx\_fraction} * (\text{Water\_Bureau\_Allocation} + \text{donor\_funding}), 1, 52)$                                                                                      | ETB/Weeks       |                                        |
| Afar.CapManEx fraction              | C  | 0.375                                                                                                                                                                                              | ETB             | AWIEB Budget                           |
| Afar.CapManEx Funds                 | S  | $\text{CapManEx\_allocation} - \text{Building/admin\_maintenance} - \text{spare\_parts\_spending} - \text{capital\_equipment\_spending}$                                                           | ETB             |                                        |
| Afar.construction spending          | F  | $(\text{new\_construction} * \text{BH\_unit\_cost}) * (1 + \text{inflation})^{(\text{TIME}/52)}$                                                                                                   | ETB/Weeks       |                                        |
| Afar.Cost per heavy vehicle         | C  | 1702000                                                                                                                                                                                            | ETB             | Expert Consultation                    |
| Afar.cost per light vehicle         | C  | 1702000                                                                                                                                                                                            | ETB             | Expert Consultation                    |
| Afar.cost per sensor                | C  | 35000                                                                                                                                                                                              | ETB             | Expert Consultation                    |
| Afar.coverage                       | C  | $\text{total\_boreholes} * \text{persons\_per\_bh}/\text{rural\_population}$                                                                                                                       | persons         |                                        |
| Afar.Deployed technicians           | S  | $\text{sending\_to\_the\_field} - \text{sending\_back}$                                                                                                                                            | persons         |                                        |
| Afar.Disasters Factor               | C  | MONTECARLO(15)                                                                                                                                                                                     | unitless        |                                        |
| Afar.distance to site               | C  | WEIBULL(1.22723, 269.56621, 1, 5, 800)                                                                                                                                                             | Kilometers      | Afar asset inventory                   |
| Afar.donor funding                  | F  | $\text{DELAY}(\text{PULSE}(\text{donor\_funds}, 1, 52), 212, 0)$                                                                                                                                   | ETB/Weeks       |                                        |
| Afar.donor funds                    | C  | $\text{"Donor\_funds\_USD"} * 39.55 * (1 - \text{earmarked\_for\_new\_construction})$                                                                                                              | ETB/Weeks       |                                        |
| Afar.Donor installing               | F  | $\text{PULSE}(1, 1, \text{SAFEDIV}(52, \text{"Donor/National\_Agency\_installation\_rate"}))$                                                                                                      | Boreholes/Weeks |                                        |
| Afar.earmarked for new construction | C  | Adjusted between 0-1 in interface (representing 0-100%)                                                                                                                                            | %               |                                        |
| Afar.expiring                       | F  | $\text{PULSE}(1, 1, 104)$                                                                                                                                                                          | vehicles/weeks  |                                        |
| Afar.fuel cost per day              | C* | $25 * 8 / 100 * \text{avg\_driving\_distance\_per\_day}[\text{Minor}]$ if Breakdown_type=Minor,<br>$25 * 29 / 100 * \text{avg\_driving\_distance\_per\_day}[\text{Major}]$ if Breakdown_type=Major | ETB             |                                        |
| Afar.functionality                  | C  | Working_total_boreholes                                                                                                                                                                            | Boreholes       |                                        |
| Afar.gov per diem                   | C  | 1700                                                                                                                                                                                               | ETB/day         | Expert Consultation                    |
| Afar.growth rate                    | C  | 0.026                                                                                                                                                                                              | rate            | Central Statistical Agency of Ethiopia |

|                                   |   |                                                                                                                                                                                                                                                                                                                                                                                                                                               |               |                     |
|-----------------------------------|---|-----------------------------------------------------------------------------------------------------------------------------------------------------------------------------------------------------------------------------------------------------------------------------------------------------------------------------------------------------------------------------------------------------------------------------------------------|---------------|---------------------|
| Afar.GSM sensors bill             | C | 42000                                                                                                                                                                                                                                                                                                                                                                                                                                         | ETB           | AWIEB Budget        |
| Afar.Heavy Equipment in the field | S | heavy_vehicles_deploying - heavy_vehicles_returning                                                                                                                                                                                                                                                                                                                                                                                           | vehicles      |                     |
| Afar.heavy vehicle purchasing     | F | IF (CapManEx_Funds>Cost_per_heavy_vehicle*(1+inflation)^(TIME/52)) THEN (IF ((Available_Heavy_Equipment+Heavy_Equipment_in_the_field)<total_technicians/5) THEN PULSE(target_vehicle_purchase_rate, 1, 52) ELSE 0) ELSE 0                                                                                                                                                                                                                     | vehicles/week |                     |
| Afar.heavy vehicle spending       | F | (fuel_cost_per_day[Major]*major_repair_days)*(1+inflation)^(TIME/52)                                                                                                                                                                                                                                                                                                                                                                          | ETB/Weeks     |                     |
| Afar.heavy vehicles deploying     | F | IF major_breakdown_probability = 1 AND major_parts_in_stock > parts_per_repair[Major]*Available_Heavy_Equipment AND minor_parts_in_stock > parts_per_repair[Minor]*Available_Heavy_Equipment AND sending_to_the_field >=2 THEN ROUND(Available_Heavy_Equipment/(major_response_time/7)) ELSE IF minor_parts_in_stock > parts_per_repair[Major]*Available_Heavy_Equipment THEN ROUND(Available_Heavy_Equipment/(major_response_time/7)) ELSE 0 | vehicles/week |                     |
| Afar.heavy vehicles returning     | F | ROUND(Heavy_Equipment_in_the_field/(major_repair_days/7))                                                                                                                                                                                                                                                                                                                                                                                     | vehicles/week |                     |
| Afar.hiring cost                  | C | minor_repair_days*vehicle_rental_cost*(1+inflation)^(TIME/52)                                                                                                                                                                                                                                                                                                                                                                                 | ETB           |                     |
| Afar.hiring technicians           | F | ROUND(PULSE(target_technician_hiring, 1, 52))                                                                                                                                                                                                                                                                                                                                                                                                 | persons/Weeks |                     |
| Afar.Hours pumped                 | S | pumping                                                                                                                                                                                                                                                                                                                                                                                                                                       | Hours         |                     |
| Afar.inflation                    | C | 0.04                                                                                                                                                                                                                                                                                                                                                                                                                                          | rate          | World Bank Databank |
| Afar.Insecurity Factor            | C | MONTECARLO(10)                                                                                                                                                                                                                                                                                                                                                                                                                                | unitless      |                     |
| Afar.Installation funds           | S | CapEx_allocation - construction_spending                                                                                                                                                                                                                                                                                                                                                                                                      | ETB           |                     |

|                                     |   |                                                                                                                                                                                                                                    |                      |                        |
|-------------------------------------|---|------------------------------------------------------------------------------------------------------------------------------------------------------------------------------------------------------------------------------------|----------------------|------------------------|
| Afar.light vehicle purchasing       | F | IF<br>(CapManEx_Funds>cost_per_light_vehicle*(<br>1+inflation)^(TIME/52))<br>AND<br>(Available_light_vehicles+Light_vehicles_in_<br>the_field)<total_technicians/2<br>THEN PULSE(target_vehicle_purchase_rate,<br>1, 52)<br>ELSE 0 | vehicles/week        |                        |
| Afar.light vehicle renting time     | C | IF Available_light_vehicles = 0 THEN 7<br>ELSE 0                                                                                                                                                                                   | Days                 |                        |
| Afar.light vehicle spending         | F | (hiring_cost*renting_vehicle+fuel_cost_per_d<br>ay[Minor]*minor_repair_days)*(1+inflation)^(<br>TIME/52)                                                                                                                           | ETB/Weeks            |                        |
| Afar.light vehicles deploying       | F | IF minor_parts_in_stock ><br>parts_per_repair[Minor]<br>AND Available_light_vehicles >= 1<br>AND sending_to_the_field >= 1<br>THEN<br>ROUND(Available_light_vehicles/(minor_res<br>ponse_time/7))<br>ELSE 0                        | vehicles/week        |                        |
| Afar.Light vehicles in the field    | S | light_vehicles_deploying -<br>light_vehicles_returning                                                                                                                                                                             | vehicles             |                        |
| Afar.light vehicles returning       | F | ROUND(Light_vehicles_in_the_field/(minor_<br>repair_days/7))                                                                                                                                                                       | vehicles/week        |                        |
| Afar.major breakdown fraction       | C | 20                                                                                                                                                                                                                                 | %                    | Expert<br>consultation |
| Afar.major breakdown<br>probability | C | MONTECARLO(major_breakdown_fraction)                                                                                                                                                                                               | unitless             |                        |
| Afar.major parts arriving           | F | ROUND(Major_Parts_procured/procurement_<br>delay)                                                                                                                                                                                  | parts/weeks          |                        |
| Afar.major parts cost               | C | 400000                                                                                                                                                                                                                             | ETB                  | Expert<br>consultation |
| Afar.major parts in stock           | S | major_parts_arriving - using_major_parts                                                                                                                                                                                           | parts                |                        |
| Afar.Major Parts procured           | S | purchasing_major_parts -<br>major_parts_arriving                                                                                                                                                                                   | parts                |                        |
| Afar.major repair days              | C | 2 +<br>ROUND((distance_to_site/avg_driving_distan<br>ce_per_day[Major])*2)                                                                                                                                                         | days                 |                        |
| Afar.major response time            | C | time_to_identify_breakdown+response_delay                                                                                                                                                                                          | days                 |                        |
| Afar.max gov install rate           | C | 2                                                                                                                                                                                                                                  | Boreholes/Mont<br>hs | Expert<br>Consultation |
| Afar.minor parts arriving           | F | ROUND(Minor_Parts_procured/procurement_<br>delay)                                                                                                                                                                                  | parts/weeks          |                        |
| Afar.minor parts cost               | C | 10000                                                                                                                                                                                                                              | ETB                  | Expert<br>Consultation |



|                                    |   |                                                                                                                                                                                        |                 |                      |
|------------------------------------|---|----------------------------------------------------------------------------------------------------------------------------------------------------------------------------------------|-----------------|----------------------|
| Afar.minor parts in stock          | S | minor_parts_arriving - using_minor_parts                                                                                                                                               | parts           |                      |
| Afar.Minor Parts procured          | S | purchasing_minor_parts - minor_parts_arriving                                                                                                                                          | parts           |                      |
| Afar.minor repair days             | C | 2 + ROUND((distance_to_site/avg_driving_distance_per_day[Minor])*2)                                                                                                                    | days            |                      |
| Afar.minor response time           | C | time_to_identify_breakdown+1+response_delay                                                                                                                                            | days            |                      |
| Afar.Monitoring allocation         | F | PULSE(Monitoring_fraction*(Water_Bureau_Allocation+donor_funding), 1, 52)                                                                                                              | ETB/Weeks       |                      |
| Afar.Monitoring fraction           | C | 0.001                                                                                                                                                                                  | ETB             | AWIEB Budget         |
| Afar.Monitoring Funds              | S | monitoring_allocation - monitoring_spending                                                                                                                                            | ETB             |                      |
| Afar.monitoring spending           | F | PULSE(("Maintenance_tools_phones"+Asset_inventory_updating_mWater+Airtime_costs+GSM_sensors_bill+Capacity_building_to_woredas)/12)*(1+inflation)^(TIME/52), 1, 4) + Sensor_maintenance | ETB/Weeks       |                      |
| Afar.MoWIE support to regions      | C | 2396665910                                                                                                                                                                             | ETB             | AWIEB Budget         |
| Afar.new construction              | F | MIN(ROUND(Installation_funds/(BH_unit_cost*target_BH_installs/52)), PULSE(max_gov_install_rate, 1, 4))                                                                                 | boreholes/weeks |                      |
| Afar.O&M allocation                | F | PULSE(O&M_fraction*(donor_funding+Water_Bureau_Allocation), 1, 52)                                                                                                                     | ETB/weeks       |                      |
| Afar.O&M fraction                  | C | 0.375                                                                                                                                                                                  | ETB             | AWIEB Budget         |
| Afar.O&M Funds                     | S | O&M_allocation-heavy_vehicle_spending - light_vehicle_spending                                                                                                                         | ETB             |                      |
| Afar.Other Depts                   | F | Regional_government_allocation*.9                                                                                                                                                      | ETB/weeks       |                      |
| Afar.Other water spending fraction | C | 0.054                                                                                                                                                                                  | ETB             | AWIEB Budget         |
| Afar.parts per repair              | C | 5 if Breakdown_Type = Major, 1 if Breakdown_Type = Minor                                                                                                                               | parts           | expert consultation  |
| Afar.per capita demand             | C | 13                                                                                                                                                                                     | Liters/person   | expert consultation  |
| Afar.per capita usage              | C | Water_Storage/(rural_population*coverage)                                                                                                                                              | Liters/person   |                      |
| Afar.persons per bh                | C | 1600                                                                                                                                                                                   | persons         | Afar asset inventory |
| Afar.procurement delay             | C | IF CapManEx_Funds > 50000000 THEN 8 ELSE 52                                                                                                                                            | weeks           | expert consultation  |
| Afar.producing                     | F | avg_production*360*Working*weekly_pumping_hours                                                                                                                                        | L/weeks         |                      |
| Afar.pumping                       | F | weekly_pumping_hours*Working*reliability_multiplier                                                                                                                                    | Hours/weeks     |                      |
| Afar.purchasing major parts        | F | ROUND(PULSE(target_parts_purchase_rate[Major], 2, 52))                                                                                                                                 | parts/Weeks     |                      |

|                                     |    |                                                                                                             |                 |                                        |
|-------------------------------------|----|-------------------------------------------------------------------------------------------------------------|-----------------|----------------------------------------|
| Afar.purchasing minor parts         | F  | ROUND(PULSE(target_parts_purchase_rate[Minor], 2, 52))                                                      | parts/Weeks     |                                        |
| Afar.refunctioning                  | F  | INF                                                                                                         | Boreholes/weeks |                                        |
| Afar.Region Funds                   | S  | Regional_government_allocation - Water_bureau_allocation - Other_depts                                      | ETB             |                                        |
| Afar.Regional government allocation | F  | PULSE(MoWIE_support_to_regions*(1+Yearly_budget_growth)^(TIME/52), 1, 52)                                   | ETB/Weeks       |                                        |
| Afar.reliability multiplier         | C  | Graphical exponential function where x axis is the number of Working boreholes and the y is between 1 and 2 | unitless        |                                        |
| Afar.Rented light vehicles          | S  | renting_vehicle - returning_vehicle                                                                         | vehicles        |                                        |
| Afar.renting vehicle                | F  | IF(O&M_Funds>hiring_cost) THEN ROUND(target_vehicle_rentals) ELSE 0                                         | vehicles/weeks  |                                        |
| Afar.repair rate                    | C* | light_vehicles_returning if Breakdown_type = Minor, heavy_vehicles_returning of Breakdown_type = Major      | boreholes/weeks |                                        |
| Afar.Repaired                       | S  | repairing - refunctioning                                                                                   | Boreholes       |                                        |
| Afar.repairing                      | F  | repair_rate[*]                                                                                              | boreholes/weeks |                                        |
| Afar.response delay                 | C  | IF Insecurity_Factor+Disasters_Factor > 0 THEN 30 ELSE 0                                                    | days            |                                        |
| Afar.returning vehicle              | F  | ROUND(Rented_light_vehicles/minor_repair_days)                                                              | vehicles/week   |                                        |
| Afar.rural population               | C  | 1812002*(1+(growth_rate))^(TIME/52)                                                                         | persons         | Central Statistical Agency of Ethiopia |
| Afar.salary                         | C  | 4741719                                                                                                     | ETB             | expert consultation                    |
| Afar.sending back                   | F  | ROUND(SAFEDIV(Deployed_technicians, minor_repair_days))                                                     | persons/week    |                                        |
| Afar.sending to the field           | F  | IF(O&M_Funds>=technician_cost) THEN (MIN(techs_needed, 5)) ELSE 0                                           | persons/week    |                                        |
| Afar.sensor coverage                | C  | Sensors/total_boreholes                                                                                     | %               |                                        |
| Afar.sensor lifetime                | C  | NORMAL(100, 20, 1, 4, 300)                                                                                  | weeks           | Sensor data                            |
| Afar.Sensor maintenance             | C  | cost_per_sensor*"installing/fixing_sensors"                                                                 | ETB             |                                        |
| Afar.Sensors                        | S  | installing/fixing_sensors - removing/breaking_sensors                                                       | sensors         |                                        |
| Afar.spare parts spending           | F  | (major_parts_cost*purchasing_major_parts+minor_parts_cost*purchasing_minor_parts)*(1+inflation)^(TIME/52)   | ETB/weeks       |                                        |

|                                   |   |                                                                                                                                                                               |                |                     |
|-----------------------------------|---|-------------------------------------------------------------------------------------------------------------------------------------------------------------------------------|----------------|---------------------|
| Afar.target BH installs           | C | Graphical function where target installs decreases from 24 to 0 as coverage goes from 0 to 1                                                                                  | Boreholes/year |                     |
| Afar.target parts purchase rate   | C | 100 if Breakdown_Type = Major, 50 if Breakdown_Type = Minor                                                                                                                   | parts/year     |                     |
| Afar.target sensor install rate   | C | "removing/_breaking_sensors"+new_construct ion+Donor_installing                                                                                                               | sensors        |                     |
| Afar.target technician hiring     | C | IF(donor_funds*Other_water_spending_fracti on > (salary*(1+inflation)^(TIME/52))) THEN 2 ELSE IF O&M_Funds > 20000000 THEN O&M_Funds/(salary*(1+inflation)^(TIME/52 )) ELSE 1 | persons/year   |                     |
| Afar.target vehicle purchase rate | C | 1                                                                                                                                                                             | vehicles/year  |                     |
| Afar.target vehicle rentals       | C | MIN(ROUND(Broken[Major]), 5)                                                                                                                                                  | vehicles/week  |                     |
| Afar.technician cost              | C | gov_perdiurn*minor_repair_days*(1+inflation )^(TIME/52)                                                                                                                       | ETB            |                     |
| Afar.technician spending          | C | sending_to_the_field*technician_cost*(1+infl ation)^(TIME/52) + hiring_technicians*salary*(1+inflation)^(TIM E/52)                                                            | ETB/weeks      |                     |
| Afar.Technicians                  | S | hiring_technicians + sending_back - sending_to_the_field                                                                                                                      | persons        |                     |
| Afar.techs needed                 | C | (Broken[Minor]+Broken[Major])*2                                                                                                                                               | persons        |                     |
| Afar.time to identify breakdown   | C | ROUND(1/breakdowns_verified + 1)                                                                                                                                              | days           |                     |
| Afar.total boreholes              | C | Working+Repaired+Broken[Minor]+Broken[ Major]                                                                                                                                 | Boreholes      |                     |
| Afar.total heavy vehicles         | C | Available_Heavy_Equipment+Heavy_Equipm ent_in_the_field                                                                                                                       | vehicles       |                     |
| Afar.total light vehicles         | C | Available_light_vehicles+Light_vehicles_in_t he_field                                                                                                                         | vehicles       |                     |
| Afar.total technicians            | C | Technicians+Deployed_technicians                                                                                                                                              | persons        |                     |
| Afar.using major parts            | F | IF major_breakdown_probability = 1 THEN (parts_per_repair[Major]+parts_per_repair[Mi nor])*heavy_vehicles_deploying ELSE 0                                                    | parts/week     |                     |
| Afar.using minor parts            | F | parts_per_repair[Minor]*light_vehicles_deplo ying                                                                                                                             | parts/week     |                     |
| Afar.vehicle rental cost          | C | 10000                                                                                                                                                                         | ETB            | expert consultation |
| Afar.Water Bureau Allocation      | F | PULSE(Water_Bureau_fraction*Regional_go vernment_allocation, 1, 52)                                                                                                           | ETB/weeks      |                     |
| Afar.Water Bureau fraction        | C | 0.1                                                                                                                                                                           | ETB            | AWIEB Budget        |

|                                                   |   |                                                                                                                                              |                 |                                                                                            |
|---------------------------------------------------|---|----------------------------------------------------------------------------------------------------------------------------------------------|-----------------|--------------------------------------------------------------------------------------------|
| Afar.Water Bureau Funds                           | S | Water_bureau_allocation + donor_funding - admin_allocation - CapEx_allocation - Monitoring_allocation - CapManEx_allocation - O&M_allocation | ETB             |                                                                                            |
| Afar.water demand                                 | F | per_capita_demand*7*rural_population*coverage                                                                                                | L/weeks         |                                                                                            |
| Afar.Water Storage                                | S | producing_water_demand                                                                                                                       | Liters          | Afar asset inventory                                                                       |
| Afar.weekly pumping hours                         | C | Imported graphical function                                                                                                                  | Hours/week      | Sensor data                                                                                |
| Afar.Working                                      | S | Donor_installing + new_construction + refunctioning - breaking                                                                               | Boreholes       |                                                                                            |
| Afar.Yearly budget growth                         | C | 0.04                                                                                                                                         | ETB             | AWIEB Budget                                                                               |
| Turkana functionality %                           | C | Working/total*100                                                                                                                            | %               |                                                                                            |
| Turkana."2018-19 National Allocation"             | C | Imported graphical function                                                                                                                  | KES             | TK County Budget Review and Outlook Paper (CBROP) 2019                                     |
| Turkana."Donor (Diocese) broken"                  | S | Diocese_schemes - Donor (Diocese) repairing                                                                                                  | Boreholes       |                                                                                            |
| Turkana."Donor (Diocese) fraction"                | C | MONTECARLO(7)                                                                                                                                | unitless        | Diocese of Lodwar, Turkana Water Project                                                   |
| Turkana."Donor (Diocese) repairing"               | F | PULSE(1, 3, (Donor_repair_time/7))                                                                                                           | Boreholes/Weeks | Diocese of Lodwar, Turkana Water Project                                                   |
| Turkana."Donor funds (USD)"                       | C | Graphical input ranging from 0 to 10000000 USD                                                                                               | USD             |                                                                                            |
| Turkana."Donor/National Agency installation rate" | C | "Donor_funds_(USD)"*earmarked_for_new_construction/BH_unit_cost                                                                              | units/year      |                                                                                            |
| Turkana.access                                    | C | Working*200*5.6/Turkana_population                                                                                                           | unitless        | Bureau of Statistics 2019 Census: ~200 HH/borehole and 5.6 people per household in Turkana |

|                                      |   |                                                                                                                                                                                                                                                                                  |                 |                               |
|--------------------------------------|---|----------------------------------------------------------------------------------------------------------------------------------------------------------------------------------------------------------------------------------------------------------------------------------|-----------------|-------------------------------|
| Turkana.adjusted installation target | C | IF Installation_funds > 0 THEN<br>IF Installation_funds ><br>10*cost_per_installation THEN<br>2*baseline_installation_target<br>ELSE baseline_installation_target<br>ELSE 0                                                                                                      | units/year      |                               |
| Turkana.all broken                   | C | "Donor_(Diocese)_broken"+Broken                                                                                                                                                                                                                                                  | Boreholes       |                               |
| Turkana.available hired vehicles     | S | hiring - returning                                                                                                                                                                                                                                                               | vehicles        |                               |
| Turkana.available owned vehicles     | S | vehicle_purchasing +<br>county_vehicles_back_from_field - expiring -<br>vehicles_to_field                                                                                                                                                                                        | vehicles        |                               |
| Turkana.available spare parts        | C | Minor_Parts_in_Stock+Major_Parts_in_Stock                                                                                                                                                                                                                                        | parts           |                               |
| Turkana.baseline contracting cost    | C | 2500000                                                                                                                                                                                                                                                                          | KES             | consultant estimate           |
| Turkana.baseline installation cost   | C | 5000000                                                                                                                                                                                                                                                                          | KES             | consultant estimate           |
| Turkana.baseline installation target | C | 26                                                                                                                                                                                                                                                                               | units/year      | CBROP                         |
| Turkana.baseline major parts cost    | C | 200000                                                                                                                                                                                                                                                                           | KES             | consultant estimate           |
| Turkana.baseline minor parts cost    | C | 5000                                                                                                                                                                                                                                                                             | KES             | consultant estimate           |
| Turkana.being born                   | C | birth_rate*Turkana_population/52                                                                                                                                                                                                                                                 | people/week     |                               |
| Turkana.birth rate                   | C | 27.2/1000                                                                                                                                                                                                                                                                        | unitless        | CIA World Data Book for Kenya |
| Turkana.breakdown rate               | C | SAFEDIV(breakdowns, TIME)                                                                                                                                                                                                                                                        | units/week      |                               |
| Turkana.breakdown threshold          | C | Set using model calibration                                                                                                                                                                                                                                                      | hours           |                               |
| Turkana.breakdowns                   | C | Hours_pumped/breakdown_threshold                                                                                                                                                                                                                                                 | Boreholes       |                               |
| Turkana.breaking                     | F | breakdown_rate                                                                                                                                                                                                                                                                   | units/week      |                               |
| Turkana.Broken                       | S | breaking - repairing                                                                                                                                                                                                                                                             | Boreholes       |                               |
| Turkana.contract completing          | F | ROUND(Contractors_in_Field/(contractor_repair_time/7))                                                                                                                                                                                                                           | contracts/weeks |                               |
| Turkana.contracting                  | F | IF(Repair_Funds > contracting_cost) THEN<br>IF(Repair_Funds > 10*contracting_cost)<br>THEN<br>IF(Repair_Funds > 20*contracting_cost)<br>THEN<br>8*contracting_requirement*breaking<br>ELSE 2*contracting_requirement*breaking<br>ELSE contracting_requirement*breaking<br>ELSE 0 | contracts/weeks |                               |
| Turkana.contracting cost             | C | baseline_contracting_cost*(1+Inflation)^(TIME/52)                                                                                                                                                                                                                                | KES             |                               |

|                                         |   |                                                                                                           |                 |                               |
|-----------------------------------------|---|-----------------------------------------------------------------------------------------------------------|-----------------|-------------------------------|
| Turkana.contracting requirement         | C | MONTECARLO(10)                                                                                            | unitless        | consultant estimate           |
| Turkana.contracting time                | C | IF contracting > 0 THEN 30 ELSE 0                                                                         | days            | consultant estimate           |
| Turkana.contractor extra days           | C | 7                                                                                                         | days            | consultant estimate           |
| Turkana.contractor hiring               | F | ROUND(Contractors_Needed/((contracting_time+response_time)/7))                                            | contracts/weeks |                               |
| Turkana.contractor repair time          | C | repair_days+contractor_extra_days                                                                         | days            |                               |
| Turkana.contractor spending             | F | contracting_cost*contracting                                                                              | KES/weeks       |                               |
| Turkana.Contractors in Field            | S | contractor_hiring - contract_completing                                                                   | contracts       |                               |
| Turkana.Contractors Needed              | S | contracting - contractor_hiring                                                                           | contracts       |                               |
| Turkana.cost per installation           | C | (baseline_installation_cost)*(1+Inflation)^(TIME/52)                                                      | KES             |                               |
| Turkana.Cost per vehicle                | C | 5000000                                                                                                   | KES             | consultant estimate           |
| Turkana.County Funds                    | S | national_government_allocation - water_department_allocation - Other_Ministries_and_Activities            | KES             |                               |
| Turkana.county vehicles back from field | F | ROUND(vehicles_in_field/(repair_days/7))                                                                  | vehicles/weeks  |                               |
| Turkana.coverage                        | C | total*(200*5.6)/Turkana_population                                                                        | persons         | 2019 Census                   |
| Turkana.death rate                      | C | 5.2/1000                                                                                                  | unitless        | CIA World Data Book for Kenya |
| Turkana.Diocese schemes                 | F | "Donor_(Diocese)_fraction"*breaking                                                                       | Boreholes/weeks |                               |
| Turkana.distance to site                | C | LOGNORMAL(66, 67, 0.4, 0.41, 354)                                                                         | km              | Asset inventory data          |
| Turkana.Donor funds Ksh                 | C | "Donor_funds_(USD)"*109.71*(1-earmarked_for_new_construction)                                             | KES             |                               |
| Turkana.Donor installing                | F | IF "Donor/National_Agency_installation_funds" > 2*cost_per_installation THEN 2*installing ELSE installing | Boreholes/weeks |                               |
| Turkana.Donor repair time               | C | 10                                                                                                        | days            | consultant estimate           |
| Turkana.Donor spending                  | F | PULSE(Donor_funds_Ksh, 1, 52)                                                                             | KES/weeks       |                               |
| Turkana.driving distance per day        | C | 150                                                                                                       | km/day          | consultant estimate           |
| Turkana.dying                           | F | Turkana_population*death_rate/52                                                                          | people/weeks    |                               |
| Turkana.earmarked for new construction  | C | Adjusted between 0-1 in interface (representing 0-100%)                                                   | unitless        |                               |
| Turkana.expiring                        | F | PULSE(1, 260, lifetime)                                                                                   | vehicles/weeks  |                               |

|                                     |   |                                                                              |                 |                       |
|-------------------------------------|---|------------------------------------------------------------------------------|-----------------|-----------------------|
| Turkana.Flood delay                 | C | 30                                                                           | days            | consultant estimate   |
| Turkana.Flooding Factor             | C | IF season = 1 THEN MONTECARLO(5)<br>ELSE 0                                   | unitless        |                       |
| Turkana.Flooding time               | C | IF Flooding_Factor > 0 THEN Flood_delay<br>ELSE 0                            | days            |                       |
| Turkana.functionality               | C | working/total                                                                | unitless        |                       |
| Turkana.hiring                      | F | MIN(IF(Repair_Funds > hiring_cost) THEN<br>Target_vehicle_hiring ELSE 0, 10) | vehicles/weeks  |                       |
| Turkana.hiring cost                 | C | repair_days*vehicle_cost_per_day                                             | KES             |                       |
| Turkana.Hours pumped                | S | pumping                                                                      | hours           |                       |
| Turkana.Inflation                   | C | 0.07                                                                         | unitless        | Central Bank of Kenya |
| Turkana.Insecurity delay            | C | 10                                                                           | days            | consultant estimate   |
| Turkana.Insecurity Factor           | C | MONTECARLO(10)                                                               | unitless        | consultant estimate   |
| Turkana.Insecurity time             | C | IF Insecurity_Factor > 0 THEN<br>Insecurity_delay ELSE 0                     | days            |                       |
| Turkana.install spending            | F | installing*cost_per_installation                                             | KES/weeks       |                       |
| Turkana.installation allocation     | F | New_installations_fraction*(water_department_allocation+Donor_spending)      | KES/weeks       |                       |
| Turkana.Installation funds          | S | installation_allocation - install_spending                                   | KES             |                       |
| Turkana.installation rate           | C | PULSE(1, 1, SAFEDIV(52,<br>adjusted_installation_target))                    | units/week      |                       |
| Turkana.installing                  | F | installation_rate                                                            | Boreholes/weeks |                       |
| Turkana.lifetime                    | C | 520                                                                          | weeks           |                       |
| Turkana.Liters per capita demand    | C | 9                                                                            | L/person/day    | consultant estimate   |
| Turkana.major breakdown probability | C | MONTECARLO(major_breakdowns_fraction)                                        | unitless        |                       |
| Turkana.major breakdowns fraction   | C | 20                                                                           | %               | consultant estimate   |
| Turkana.Major parts arriving        | F | ROUND(Major_Parts_En_Route/(procurement_time/7))                             | parts/weeks     |                       |
| Turkana.major parts cost            | C | baseline_major_parts_cost*(1+Inflation)^(TIME/52)                            | KES             |                       |
| Turkana.Major Parts En Route        | S | purchasing_major_parts - major_parts_arriving                                | parts           |                       |
| Turkana.Major Parts in Stock        | S | major_parts_arriving - using_major_parts                                     | parts           |                       |
| Turkana.major parts per repair      | C | 1                                                                            | parts           |                       |
| Turkana.Minor parts arriving        | F | ROUND(Minor_Parts_En_Route/(procurement_time/7))                             | parts/weeks     |                       |
| Turkana.minor parts cost            | C | baseline_minor_parts_cost*(1+Inflation)^(TIME/52)                            | KES             |                       |

|                                         |    |                                                                                                                                                                                                                                          |                     |                      |
|-----------------------------------------|----|------------------------------------------------------------------------------------------------------------------------------------------------------------------------------------------------------------------------------------------|---------------------|----------------------|
| Turkana.Minor Parts En Route            | S  | purchasing_minor_parts -<br>minor_parts_arriving                                                                                                                                                                                         | parts               |                      |
| Turkana.Minor Parts in Stock            | S  | minor_parts_arriving - using_minor_parts                                                                                                                                                                                                 | parts               |                      |
| Turkana.minor parts per repair          | C  | 5                                                                                                                                                                                                                                        | parts               |                      |
| Turkana.national government allocation  | F  | "2018-<br>19_National_Allocation"*(1+Yearly_budget_<br>growth)^(TIME/52)                                                                                                                                                                 | KES/weeks           |                      |
| Turkana.new construction %              | C  | earmarked_for_new_construction*100                                                                                                                                                                                                       | %                   |                      |
| Turkana.New installations Fraction      | C  | 125000000/377000000                                                                                                                                                                                                                      | unitless            | CBROP                |
| Turkana.Other Ministries and Activities | F  | national_government_allocation-<br>water_department_allocation                                                                                                                                                                           | KES/weeks           |                      |
| Turkana.Other water expenses            | F  | Other_water_spending_fraction*water_depart<br>ment_allocation                                                                                                                                                                            | KES/weeks           |                      |
| Turkana.Other water spending fraction   | C  | 1-Repairs_and_Maintenance_fraction-<br>New_installations_fraction                                                                                                                                                                        | unitless            |                      |
| Turkana.procurement time                | C  | 30                                                                                                                                                                                                                                       | days                | consultant estimate  |
| Turkana.producing                       | F  | weekly_pumping_hours*Total_Production_ca<br>pacity                                                                                                                                                                                       | L/weeks             |                      |
| Turkana.production capacity clusters    | C* | Arrayed converter clustering based on pump<br>production capacity between 4200 and 48,000                                                                                                                                                | L/hrs               | Asset inventory data |
| Turkana.production fractions            | C* | Arrayed converter for the probability of a<br>pump being in each production capacity<br>cluster                                                                                                                                          | unitless            | Asset inventory data |
| Turkana.pumping                         | F  | Working*weekly_pumping_hours*reliability_<br>multiplier                                                                                                                                                                                  | hours/week          |                      |
| Turkana.purchasing major parts          | F  | IF Repair_Funds > 0 THEN<br>IF Major_Parts_in_Stock > 20 THEN 0 ELSE<br>IF Repair_Funds > 100*major_parts_cost<br>AND Major_Parts_in_Stock < 5<br>THEN 2*Target_purchase_rate[Major] ELSE<br>Target_purchase_rate[Major]<br>ELSE 0       | parts/weeks         |                      |
| Turkana.purchasing minor parts          | F  | IF Repair_Funds > 0 THEN<br>IF Minor_Parts_in_Stock > 100 THEN 0<br>ELSE<br>IF Repair_Funds > 100*minor_parts_cost<br>AND Minor_Parts_in_Stock < 25<br>THEN 10*Target_purchase_rate[Minor]<br>ELSE Target_purchase_rate[Minor]<br>ELSE 0 | parts/weeks         |                      |
| Turkana.refunctioning                   | F  | INF                                                                                                                                                                                                                                      | Boreholes/week<br>s |                      |



|                                           |    |                                                                                                                                                                                                                          |                 |                                              |
|-------------------------------------------|----|--------------------------------------------------------------------------------------------------------------------------------------------------------------------------------------------------------------------------|-----------------|----------------------------------------------|
| Turkana.reliability multiplier            | C  | Graphical exponential function where x axis is the number of Working boreholes and the y is between 1 and 2                                                                                                              | unitless        |                                              |
| Turkana.repair and maintenance allocation | F  | Repairs_and_Maintenance_fraction*(water_department_allocation+Donor_spending)                                                                                                                                            | KES/weeks       |                                              |
| Turkana.repair days                       | C  | 2 + ROUND((distance_to_site/driving_distance_per_day)*2)                                                                                                                                                                 | days            |                                              |
| Turkana.Repair Funds                      | S  | repair_and_maintenance_allocation - vehicle_spending - spare_parts_spending - contractor_spending                                                                                                                        | KES             |                                              |
| Turkana.repair rate                       | C  | county_vehicles_back_from_field+contract_completing                                                                                                                                                                      | units/week      |                                              |
| Turkana.Repaired                          | S  | repairing + Donor_(Diocese)_repairing - refunctioning                                                                                                                                                                    | Boreholes       |                                              |
| Turkana.repairing                         | F  | repair_rate                                                                                                                                                                                                              | Boreholes/weeks |                                              |
| Turkana.Repairs and Maintenance fraction  | C  | 52500000/377000000                                                                                                                                                                                                       | unitless        | CBROP                                        |
| Turkana.response time                     | C  | time_to_find_out_about_breakdown + Insecurity_time+Flooding_time                                                                                                                                                         | days            |                                              |
| Turkana.returning                         | F  | ROUND(available_hired_vehicles/(repair_days/7))                                                                                                                                                                          | vehicles/week   |                                              |
| Turkana.season                            | C  | Graphical input of 1 or 0 representing wet or dry season based on Kenya's long and short rains                                                                                                                           | unitless        | National Drought Management Authority (NDMA) |
| Turkana.spare parts spending              | F  | (major_parts_cost*purchasing_major_parts+minor_parts_cost*purchasing_minor_parts)*(1+Inflation)^(TIME/52)                                                                                                                | KES/weeks       |                                              |
| Turkana.Target purchase rate              | C* | Arrayed converter: 20 for Minor Parts, 2 for Major Parts                                                                                                                                                                 | parts/week      |                                              |
| Turkana.Target vehicle hiring             | C  | ROUND(Broken/8)                                                                                                                                                                                                          | vehicles/week   |                                              |
| Turkana.Target vehicle purchase rate      | C  | 1                                                                                                                                                                                                                        | vehicles/year   |                                              |
| Turkana.time to find out about breakdown  | C  | 1                                                                                                                                                                                                                        | days            | consultant estimate                          |
| Turkana.total                             | C  | Working+Repaired+Broken+"Donor_(Diocese)_broken"                                                                                                                                                                         | Boreholes       |                                              |
| Turkana.Total Production capacity         | C  | Working*(production_fractions[From_3_to_5]*production_capacity_clusters[From_3_to_5] + production_fractions[Above_5_below_10]*production_capacity_clusters[Above_5_below_10] + production_fractions[Above_10_below_20]*p | L/hr            |                                              |

|                                     |   |                                                                                                                                                                                                                                                                                                                                                                        |               |                     |
|-------------------------------------|---|------------------------------------------------------------------------------------------------------------------------------------------------------------------------------------------------------------------------------------------------------------------------------------------------------------------------------------------------------------------------|---------------|---------------------|
|                                     |   | roduction_capacity_clusters[Above_10_below_20] +<br>production_fractions[Above_20]*production_capacity_clusters[Above_20])                                                                                                                                                                                                                                             |               |                     |
| Turkana.Turkana population          | S | being_born - dying                                                                                                                                                                                                                                                                                                                                                     | People        |                     |
| Turkana.using                       | F | Liters_per_capita_demand*Turkana_population*7                                                                                                                                                                                                                                                                                                                          | L/weeks       |                     |
| Turkana.using major parts           | F | IF major_breakdown_probability = 1 THEN<br>(major_parts_per_repair)*vehicles_to_field<br>ELSE 0                                                                                                                                                                                                                                                                        | parts/weeks   |                     |
| Turkana.using minor parts           | F | minor_parts_per_repair*vehicles_to_field                                                                                                                                                                                                                                                                                                                               | parts/weeks   |                     |
| Turkana.vehicle cost per day        | C | 10000                                                                                                                                                                                                                                                                                                                                                                  | KES/day       | consultant estimate |
| Turkana.vehicle hiring time         | C | IF available_owned_vehicles = 0 THEN 7<br>ELSE 0                                                                                                                                                                                                                                                                                                                       | days          |                     |
| Turkana.vehicle purchasing          | F | IF (Repair_Funds>Cost_per_vehicle) THEN<br>(IF<br>((available_owned_vehicles+vehicles_in_field)<br><5) THEN<br>PULSE(Target_vehicle_purchase_rate, 1, 52)<br>ELSE 0)<br>ELSE 0                                                                                                                                                                                         | vehicles/week |                     |
| Turkana.vehicle spending            | F | (hiring_cost*hiring +<br>Cost_per_vehicle*vehicle_purchasing)*(1+Inflation)^(TIME/52)                                                                                                                                                                                                                                                                                  | KES/weeks     |                     |
| Turkana.vehicles in field           | S | vehicles_to_field -<br>county_vehicles_back_from_field                                                                                                                                                                                                                                                                                                                 | vehicles      |                     |
| Turkana.vehicles to field           | F | IF major_breakdown_probability = 1 THEN<br>IF Major_Parts_in_Stock ><br>1*available_owned_vehicles AND<br>Minor_Parts_in_Stock ><br>5*available_owned_vehicles THEN<br>ROUND(available_owned_vehicles/(response_time/7))<br>ELSE IF Minor_Parts_in_Stock ><br>5*available_owned_vehicles THEN<br>ROUND(available_owned_vehicles/(response_time/7))<br>ELSE 0<br>ELSE 0 | vehicles/week |                     |
| Turkana.water department allocation | F | national_government_allocation*water_dept_budget_fraction                                                                                                                                                                                                                                                                                                              | KES/weeks     |                     |
| Turkana.water dept budget fraction  | C | 377000000/1077020000                                                                                                                                                                                                                                                                                                                                                   | CBROP         |                     |

|                              |   |                                                                                                                                   |            |             |
|------------------------------|---|-----------------------------------------------------------------------------------------------------------------------------------|------------|-------------|
| Turkana.Water Dept Funds     | S | water_department_allocation + Donor_spending - installation_allocation - repair_and_maintenance_allocation - Other_water_expenses | KES        |             |
| Turkana.water stored         | S | producing - using                                                                                                                 | L          |             |
| Turkana.weekly pumping hours | C | Imported graphical function                                                                                                       | Hours/week | Sensor data |
| Turkana.Working              | S | Installing + Donor_installing + refunctioning - breaking                                                                          | Boreholes  |             |
| Turkana.Yearly budget growth | C | 0.06                                                                                                                              | unitless   |             |

### References

Central Statistical Agency, 2013. Population Projection at Wereda Level from 2014-2017. Federal Democratic Republic of Ethiopia.

Climate-Data.org, 2019. Climate data for cities worldwide [WWW Document]. URL <https://en.climate-data.org/> (accessed 10.2.19).

Kenya National Bureau of Statistics, 2019. Volume II: Distribution of Population by Administrative Units (Census Report), 2019 Kenya Population and Housing Census.

mWater [WWW Document], 2021. mWater. URL <https://www.mwater.co/> (accessed 12.3.21).

WHO, UNICEF, 2020. JMP [WWW Document]. JMP Households Data. URL <https://washdata.org/data/household#!/> (accessed 12.3.21).
